1  
2  
3  
4  
5  
6  
7  
8  
9  
10  
11  
12  
13  
14  
15  
16  
17  
18  
19  
20  
21  
22  
23  
24  
25  
26  
27  
28  
29  
30  
31  
32  
33  
34  
35  
36  
37  
38  
39  
40  
41  
42  
43  
44  
45  
46  
47  
48  
49

## **A different state of mind: neural activity related to volitionally up- versus downregulating cortical excitability**

Kathy Ruddy<sup>1,2</sup>, Joshua Balsters<sup>1,3</sup>, Dante Mantini<sup>1,4</sup>, Quanying Liu<sup>1,4</sup>, Pegah Kassraian-Fard<sup>1</sup>, Nadja Enz<sup>1</sup>, Ernest Mihelj<sup>1</sup>, Bankim Chander<sup>5</sup>, Surjo Soekadar<sup>5</sup>, Nicole Wenderoth<sup>1</sup>.

1. Neural Control of Movement Lab, ETH, Zürich, Switzerland.
2. Institute of Neuroscience, Trinity College Dublin, Ireland
3. Royal Holloway, University of London, UK
4. Movement Control and Neuroplasticity Research Group, KU Leuven, Leuven, Belgium
5. University of Tübingen, Germany

50

51

52

53

54 **Abstract**

55

56 To date there exists no reliable method to non-invasively upregulate or downregulate  
57 the state of the resting motor system over a large dynamic range. Here we show that  
58 an operant conditioning paradigm which provides neurofeedback of the size of motor  
59 evoked potentials (MEPs) in response to transcranial magnetic stimulation (TMS),  
60 enables participants to self-modulate their own brain state. Following training,  
61 participants were able to robustly increase (by 83.8%) and decrease (by 30.6%) their  
62 MEP amplitudes. This volitional up- versus downregulation of corticomotor  
63 excitability caused an increase of late-cortical disinhibition (LCD), a read-out of  
64 presynaptic GABA<sub>B</sub> disinhibition which was accompanied by an increase of gamma  
65 and a decrease of alpha oscillations in the trained hemisphere. This approach paves  
66 the way for future investigations into how altered brain state influences motor  
67 neurophysiology and recovery of function in a neurorehabilitation context.

68

69

70

71

72

73 **Introduction**

74

75 Rhythmic oscillatory brain activity at rest is associated with high versus low  
76 neuronal responsiveness, or ‘excitability’ of a region <sup>1,2</sup>. Measuring these momentary  
77 fluctuations of neural activity via electro- or magnetoencephalography (EEG/MEG)  
78 over human primary motor cortex (M1), it has been demonstrated that frequency,  
79 amplitude and phase of the ongoing oscillation cycle systematically modulate  
80 responses evoked by transcranial magnetic stimulation (TMS) <sup>3-5 6-8</sup>. In particular, it  
81 has been shown that corticomotor excitability is significantly higher when the power  
82 (amplitude) of sensorimotor rhythms in the alpha band (8-14 Hz, also called the ‘mu’-  
83 rhythm), or beta band (15-30 Hz) are low, or when M1 is stimulated during the  
84 trough of the oscillatory cycle of these rhythms <sup>9</sup>. This concept has inspired  
85 neurofeedback interventions whereby, for example, stroke patients learn to  
86 volitionally desynchronize sensorimotor rhythms with the goal of bringing the

87 sensorimotor system into a more excitable state as a precursor for enhanced neural  
88 plasticity and accelerated recovery<sup>10-12</sup>.

89

90 Previous research has focussed on interactions between corticomotor  
91 excitability and cortical dynamics at rest, but much less is known about whether it is  
92 possible to *voluntarily* control the excitability of sensorimotor circuits while keeping  
93 motor output and sensory feedback constant. In the case of stroke rehabilitation, this  
94 mechanism may become particularly relevant as patients are unable to move or  
95 receive sensory feedback from the paretic limb. Therefore, interventions that  
96 optimally harness the residual ability to voluntarily and endogenously activate  
97 relevant brain circuits in the days and weeks early after the incident, may provide the  
98 crucial innervation necessary to promote re-wiring for functional recovery<sup>13</sup>.

99

100 It is well known that primates<sup>14,15</sup>, and humans<sup>10, eg. 16-19</sup> can gain volitional  
101 control of neural activity by receiving neurofeedback via a brain-computer interface  
102 (BCI). Here, we used a BCI-neurofeedback approach as an effective method for  
103 training participants to both volitionally upregulate and downregulate corticomotor  
104 excitability as reflected by the size of TMS-evoked motor potentials (MEPs), with the  
105 aim to modulate their amplitudes over a much larger dynamic range than observed  
106 during rest. Using this approach enabled us to investigate the neural mechanisms that  
107 underlie volitional up- versus down-regulation of corticospinal excitability in the  
108 motor system and the associated oscillatory signatures. By modulating one neural  
109 marker, i.e. motor evoked potential amplitude, while measuring independent  
110 modalities using EEG, or paired-pulse TMS, this approach allows us to causally relate  
111 voluntary rather than incidental changes of corticomotor excitability to cortical  
112 dynamics.

113

114 To achieve this goal we developed a BCI by stimulating the cortex with TMS  
115 and providing neurofeedback of MEP amplitudes (Fig. 1). The feedback was designed  
116 such that participants were rewarded for larger than average MEPs in one condition,  
117 and smaller than average in another condition.

118 In a within-subject cross-over design, participants performed four training  
119 sessions with TMS-neurofeedback of MEP amplitudes in order to learn how to up-  
120 and downregulate their corticomotor excitability (two 'UP' sessions, two 'DOWN'

121 sessions, order counterbalanced across participants). After the training we  
122 characterised the neural underpinnings of these two distinct activity states in detail by  
123 conducting a series of multimodal experiments using EEG and paired pulse TMS to  
124 profile the associated oscillatory and neurophysiological processes. As it has been  
125 proposed that dynamic modulation of neuronal activity is realized via synchronization  
126 of high frequency rhythms<sup>20</sup> which are tightly coupled to desynchronizing  
127 sensorimotor rhythms<sup>21</sup>, we hypothesised that Gamma synchronisation (31-80Hz)  
128 and alpha (8-13Hz) /beta (14-30Hz) desynchronization play a critical role in actively  
129 determining the state of the motor cortex.

130

131

## 132 **RESULTS**

133

134 *Bidirectional changes in corticospinal excitability were observed in the MEP*  
135 *neurofeedback group but not in a control group.*

136

137 We first tested whether participants could learn to volitionally increase or decrease  
138 corticomotor excitability when using a motor imagery strategy shaped by  
139 neurofeedback of MEP amplitudes. Across two training sessions, we found that MEP  
140 amplitudes increased during UP training (Fig. 2A, orange symbols) and decreased  
141 during DOWN training (Fig. 2A, blue symbols) relative to the baseline measurement  
142 (BS), revealing a significant dissociation over time (*neurofeedback type x block*  
143 *number* interaction during training session 1 [ $F(4,115.9)=3.87, p=0.006$ ], session 2  
144 [ $F(4,125.0)=3.7, p=0.007$ ] and EEG session [ $F(2,70)=6.9, p=0.002$ ], *F tests following*  
145 *mixed effects models, n=15; see supplementary Fig. 1 for additional analyses). Since*  
146 *MEP amplitudes are a compound measure of excitability influenced by multiple*  
147 *neural elements<sup>22</sup>, including background muscle activity<sup>23,24</sup>, we repeated this*  
148 *analysis using the root mean squared (rms) background muscle activation (EMG)*  
149 *recorded in the 100ms prior to each TMS pulse. Importantly, this control analysis*  
150 *revealed no such interactions on any of the sessions, suggesting that the observed*  
151 *modulation was not driven by changes in activity of the target muscle, nor any of the*  
152 *additional 3 control muscles (OP, ADM, left FDI) (all  $p>0.18$ , see Supplementary*  
153 *Table 2).*

154

155 In order to isolate the effect of the neurofeedback, we included a control group who  
156 undertook the same protocol, using the same mental imagery strategies, but with

157 feedback that was not contingent on the MEP amplitudes. This group exhibited no  
158 systematic changes of corticomotor excitability across training (Fig. 2B) and mixed  
159 effects models revealed no significant *neurofeedback type* x *block number*  
160 interactions on any of the separate testing sessions in the control group (all  $p > 0.06$ ,  
161 note that statistics approached significance for the second session because MEPs were  
162 randomly higher in the DOWN than in the UP condition ; see Supplementary Fig. 1B  
163 for further details). Additionally, there were no significant differences in background  
164 EMG (All  $p > 0.09$ , Supplementary Table 2). Next we compared the performance of  
165 the experimental and the control group, by normalizing MEP amplitudes to baseline  
166 (% change) and calculating the difference between UP and DOWN (Fig. 2C). The  
167 differences were substantial in the experimental group, who exhibited on average  
168 MEP amplitudes twice as large during UP than during DOWN, and differed  
169 significantly from the control group where systematic differences were virtually  
170 absent (effect of ‘Group’ [ $F(1,25.6)=13.32, p=0.001$ ], *F tests following mixed effects*,  
171  $n=28$ ). The effect sizes (Cohen’s  $d$ ) of the between-group differences were small for  
172 the first two blocks ( $< 0.5$ ), but consistently increased during training ( $d= 1.27$  for  
173 block 8), and remained high in the two blocks of the EEG session ( $d > 0.97$ ). As the  
174 control group were executing the same mental imagery strategies as the experimental  
175 group, this comparison demonstrates that veridical TMS neurofeedback was essential  
176 for gaining volitional control over corticomotor excitability.

177

178 *Neurofeedback training effects are retained for at least 6 months*

179

180 In a follow-up investigation approximately 6 months following initial neurofeedback  
181 training, we showed for a subset of the participants ( $n=11$ ) that they had retained the  
182 ability to upregulate and downregulate their MEP amplitude with neurofeedback  
183 (Fig.3; significant effect of neurofeedback type (UP vs DOWN) in a retention block  
184 carried out with no top-up training ( $F(1,10)=6.64, p=0.028$ ). Measurements of resting  
185 MEP amplitude taken 5 and 10 minutes following the retention block indicated no  
186 after-effects (all  $p > 0.2$ ) indicating that subjects could acutely control corticomotor  
187 excitability without long-lasting after-effects. Having verified that the ability to  
188 modulate brain states had been robustly retained, we next tested whether participants  
189 could sustain this performance even when feedback was removed. Performing a  
190 feedback-free block, we found that MEP amplitude was significantly larger in the UP  
191 versus DOWN condition ( $F(1,10)=12.32, p=0.006$ ), indicating that when participants

192 have reached a sufficient level of training they have optimised their mental strategies  
193 and no longer require continuous feedback.

194

195

196 In order to measure whether the feedback-induced changes in corticospinal  
197 excitability were specific to the hemisphere targeted by the neurofeedback, we used  
198 two TMS coils simultaneously and performed one block of 40 trials, where half of the  
199 TMS pulses were applied to the left hemisphere (i.e. the usual feedback hemisphere),  
200 and the other half to the right (i.e. the opposite hemisphere). We found that the same  
201 pattern of upregulation and downregulation of MEP amplitudes was observed in the  
202 opposite hemisphere, an effect that approached significance ( $F(1,20)=4.032$ ,  $p=0.07$ )  
203 but was much smaller than in the neurofeedback hemisphere particularly for the UP  
204 condition (UP  $d = 1.01$  for neurofeedback hemi,  $d=0.27$  for opp. hemi, DOWN  $d=$   
205  $0.40$  for neurofeedback hemi,  $d=0.35$  for opp. hemi, Fig. 3).

206

207

208 *Paired pulse TMS investigation of mechanisms*

209

210 Finally, we investigated which excitatory/inhibitory circuits may have contributed to  
211 the changes in corticomotor excitability, using paired pulse TMS measures of three  
212 different neurophysiological processes: (i) Short-interval intracortical inhibition  
213 (SICI), believed to reflect postsynaptic GABA<sub>A</sub> inhibition<sup>25</sup>; (ii) Long interval intra-  
214 cortical inhibition (LICI), considered as a marker for postsynaptic GABA<sub>B</sub> inhibition;  
215 and (iii) late-cortical disinhibition (LCD), which is thought to measure presynaptic  
216 GABA<sub>B</sub> disinhibition, and manifests as a period in which MEP amplitude returns to  
217 and typically overshoots baseline levels, in a time window following LICI (~220ms  
218 after a suprathreshold conditioning TMS pulse)<sup>26-28</sup>. In the following analyses we  
219 determined the time point (baseline vs during NF) x neurofeedback type (UP,  
220 DOWN) interaction and applied FDR correction for multiple testing. Single pulse  
221 MEPs collected during these measurement blocks (25% of all trials) revealed  
222 significantly larger MEP amplitudes for the UP than the DOWN condition, replicating  
223 the findings of the main experiment (Fig. 4A; significant time point x neurofeedback  
224 type interaction:  $F(1,27.67)=14.36$ ,  $p_{FDR}=0.001$ ). Surprisingly, there were no  
225 significant differences in the magnitude of SICI (% of single pulse MEPs) between  
226 the resting baseline data and the SICI MEPs collected during neurofeedback, nor

227 between the UP versus DOWN states (time point x neurofeedback type interaction  
228 [F(1,28.31)=0.08,  $p_{FDR}=0.77$ ]). The same was true for LICI (time point x  
229 neurofeedback type interaction [F(1,28.90)=0.02,  $p_{FDR}=0.88$ ]). Thus, circuits  
230 controlling postsynaptic inhibition did not seem to be differentially modulated by the  
231 UP versus DOWN state. However, for LCD there was a significant time point x  
232 neurofeedback type interaction (F(1,28.35)=12.09,  $p_{FDR}=0.002$ , Fig.4B).

233 Pairwise comparisons revealed that LCD was significantly elevated in the UP  
234 condition, when compared to the baseline measurement taken immediately before  
235 neurofeedback (Fig. 4B, right panel, MeanDiff=50.9%,  $df=28.35$ ,  $p<0.001$ ) and when  
236 compared to the equivalent data recorded in the DOWN condition (MeanDiff=56.1%,  
237  $df=28.76$ ,  $p<0.001$ ). For the DOWN condition LCD did not differ significantly from  
238 baseline ( $p=0.45$ ).

239  
240

#### 241 *Distinct oscillatory signatures for high versus low corticospinal excitability*

242

243 As part of the initial training study (see Figure 2A, ‘Ses 3’ for the behavioural  
244 results), we investigated whether the two different activity states evoked differential  
245 cortical dynamics extracted from EEG recordings which were acquired  
246 simultaneously while TMS was being performed to provide neurofeedback of MEP  
247 amplitude. As distinct functions have been ascribed to 8 different sub-frequency  
248 bands across the known range of brain signals (0.1 - 80Hz), we now probed whether  
249 volitional changes in corticospinal excitability of M1, drives neural activity measured  
250 in the delta (0.1-4Hz), theta (5-7Hz), low alpha (8-10Hz), high alpha (11-13Hz), low  
251 beta (14-21Hz), high beta (22-30Hz), low gamma (31-50Hz) and high gamma (51-  
252 80Hz) bands. Using the portion of EEG data collected in the 1.5 seconds prior to each  
253 TMS pulse, we calculated relative power in the UP and DOWN states for the eight  
254 frequency bands of interest. Figure 5a-f ( $n=15$ ) shows that UP- versus DOWN  
255 regulating corticomotor excitability caused reduced band-limited power in the theta  
256 and alpha band (blue areas in Fig.5b-d) while gamma power was clearly increased.  
257 (red areas in Fig.5e,f). For each participant, we extracted the information for the  
258 electrode closest to their individual motor hotspot (Figure 5a shows the different  
259 locations across participants) and calculated whether the UP-DOWN difference ( $\Delta$   
260 relative power %) deviated significantly from 0 (Fig. 5g). Wilcoxon signed rank tests  
261 revealed significantly higher power for the UP than DOWN condition in the Delta

262 (p=0.024, d=0.754), Low Gamma (p<sub>FDR</sub>=0.024, d=0.753) and High Gamma  
263 (p<sub>FDR</sub>=0.016, d=0.712) band and significantly lower power for UP than DOWN in the  
264 theta (p<sub>FDR</sub>=0.003, d=0.947), low alpha (p<sub>FDR</sub>=0.004, d=0.805) and high alpha band  
265 (p<sub>FDR</sub>=0.007, d=0.714). Although the feedback was lateralised to MEPs from the right  
266 limb (left hemisphere motor hotspot), we also quantified the same neural oscillations  
267 at the corresponding location in the opposite hemisphere. Here, only the theta rhythm  
268 showed significantly lower power for the UP than the DOWN state (p<sub>FDR</sub><0.001,  
269 d=1.071, see Supplementary Fig. 2).

270

271         Next, we tested whether the amplitude of neural oscillations recorded at the  
272 hotspot at the time of each TMS pulse could predict the amplitude of the resulting  
273 MEPs. For each participant, MEP amplitudes of the 120 trials (60 UP, 60 DOWN)  
274 were entered as the outcome variable in a robust regression model with trial-by-trial  
275 relative power values for each frequency band as predictor variables. Regression  
276 slopes (beta values) for each participant were carried forward into a group level  
277 analysis (Fig. 5m), and Wilcoxon signed rank tests were used to establish whether the  
278 slopes were significantly different from 0 (a 0 slope would indicate no statistical  
279 relationship between predictor and outcome variable). Lower amplitude oscillations in  
280 theta (p<sub>FDR</sub>=0.024, Fig.5h), low alpha (p<sub>FDR</sub><0.001) and high alpha (p<sub>FDR</sub>=0.002) were  
281 predictive of larger MEP amplitudes, and higher amplitude oscillations in low gamma  
282 (p<sub>FDR</sub>=0.020) and high gamma (p<sub>FDR</sub>=0.020) were significant predictors of larger  
283 MEP amplitudes. In a previous study, it was reported that a strong predictor of  
284 cortical excitability was the low gamma : high alpha ratio <sup>3</sup>. We replicated this  
285 finding, demonstrating that this ratio was a significant predictor of MEP amplitude  
286 (p<sub>FDR</sub>=0.016) with larger ratios predicting larger MEP amplitudes.

287

288 *EEG data classification*

289

290 We next tested whether the distinction between the two trained states was large  
291 enough that the individual data trials could be successfully predicted as ‘UP’ state or  
292 ‘DOWN’ state, using machine learning based solely on the EEG power values  
293 (relative power data, scaled by 1/f transformation) of the 8 frequency bands of  
294 interest. A linear support vector machine (SVM) was applied to the data of each  
295 participant (60 UP 60 DOWN epochs). The SVM has been shown to be particularly



296 powerful on EEG data, which is noisy and contains many features that are correlated.  
297 This approach additionally allowed us to perform feature selection, to quantify which  
298 EEG features most heavily contributed to the distinction between the two states.  
299 Using only data from the electrode closest to the hotspot (8 rhythms plus  
300 LowGamma:HighAlpha ratio) the SVM was capable of classifying the brain states  
301 with an average accuracy of 81.5% ( $\pm 5.1\%$ ) based on 10-fold cross validation which  
302 differed significantly ( $p=0.001$ ,  $n=14$ ) from a null model revealed by permutation  
303 testing (accuracy null model: 49.0%  $\pm 13$ ). Additionally, incorporating data from the  
304 same rhythms recorded at the corresponding electrode in the opposite hemisphere  
305 increased this accuracy to 85.1% ( $\pm 4.6\%$ ) across participants (see Supplementary  
306 Table 1). Using feature ranking based on Recursive Feature Elimination (RFE), taking  
307 the mode of the top ranked features across participants revealed that the strongest  
308 contribution to the high classification accuracy of the latter SVM was the High  
309 Gamma rhythm in the hotspot electrode, followed by High Alpha at the hotspot, then  
310 the LowGamma:HighAlpha ratio (for full ranking order see Supplementary Table 1).

311

312

313

314

315

316

## 317 **Discussion**

318

319 Here we aimed to uncover neural activity evoked by voluntarily facilitating or  
320 suppressing excitability within sensorimotor circuits, while keeping motor output and  
321 sensory feedback constant. We show that using a bidirectional TMS-neurofeedback  
322 approach is critical to gain volitional control over MEP amplitudes, a skill that is  
323 retained for at least 6 months without further training. This voluntary state-setting  
324 with a large dynamic range is causally related to modulating pre-synaptic GABA<sub>B</sub>  
325 mediated disinhibition and to a prominent increase of gamma power in sensorimotor  
326 cortex for the UP state which was accompanied by a clear reduction of power in the  
327 theta, low and high alpha bands.

328

### 329 ***Volitional control of corticomotor excitability***

330 Previous studies have shown that it is possible to gain voluntary control over activity  
331 in the central nervous system if appropriate neurofeedback is embedded in a

332 reinforcement learning task, with food rewards for animals<sup>14,15</sup> and visually  
333 rewarding stimuli for humans<sup>19,29</sup>. Here we confirm that this approach is also suitable  
334 for learning how corticomotor excitability can be bidirectionally up- or down-  
335 regulated. Our participants were initially familiarized with two motor imagery  
336 strategies which are known to modulate corticospinal excitability in the required  
337 manner<sup>29-32</sup>. Learning, however, indicated by progressively stronger dissociation  
338 between the UP and the DOWN state, only took place when direct low-latency  
339 feedback regarding the MEP amplitude was provided. After training, participants  
340 were able to modulate corticomotor excitability across a large range so that MEP  
341 amplitudes were approximately twice as large during the UP than the DOWN  
342 condition. UP training, in particular, resulted in an 83.8% increase of MEP amplitudes  
343 from baseline, while downregulation of MEP amplitude was possible<sup>eg. see 29</sup> but  
344 more difficult (30.6% decrease from baseline). Once acquired, volitional control of  
345 corticomotor excitability was retained for at least 6 months and could be performed  
346 even without online feedback indicating true, long-term learning<sup>33</sup>.

347

348       Once participants could control their corticomotor excitability, we uncovered  
349 the electrophysiological underpinnings by applying measurements that were  
350 independent of the feedback modality (single pulse TMS) and investigated whether  
351 there were differences between the UP versus DOWN state. This approach cancelled  
352 out the effects that were common to both mental strategies, isolating the mechanisms  
353 underlying the MEP modulation. This revealed two key novel electrophysiological  
354 findings, involving presynaptic GABA<sub>B</sub> disinhibition, and gamma oscillations.  
355 Additionally, the pronounced changes of cortical physiology despite the absence of  
356 EMG activity or changes in sensory input suggests that the increase vs decrease of  
357 corticomotor excitability was -a least partly- of cortical origin rather than mediated by  
358 spinal cord mechanisms.

359

360

361 *Different excitability states cause modulation of GABA<sub>B</sub> mediated inhibitory*  
362 *circuits*

363

364       The UP state was associated with a significant increase of LCD while other  
365 measurements probing inhibitory M1 circuits failed to reveal differential effects for

366 the UP versus DOWN state. LCD is thought to represent a read-out of the presynaptic  
367 self-inhibition of GABAergic neurons which is thought to be mediated by  
368 extrasynaptic GABA<sub>B</sub> auto-receptors<sup>34,35</sup>. This mechanism is hypothesized to result in  
369 a net facilitatory effect as observed during the UP condition in our study. Previously,  
370 LCD was found to be elevated during motor imagery (MI), but this increase relative  
371 to rest was observed irrespective of whether participants imagined voluntarily  
372 activating or relaxing hand muscles<sup>36</sup>. However, this investigation was conducted in  
373 a single session, and did not employ neurofeedback, so MEP modulation by these two  
374 imagination conditions could be expected to be substantially smaller than observed in  
375 our study, particularly for the voluntary relaxation condition which had a similar  
376 excitability state as the rest condition. Thus, it is possible that the clear modulation of  
377 LCD observed here only manifested after neurofeedback training, i.e. when the two  
378 excitability states became clearly distinct. It is important to note here that group level  
379 results indicated no LCD at rest, and in fact it was only evident during the UP state.  
380 While LCD is elicited more readily during contraction<sup>28</sup>, some studies have reported  
381 LCD at rest<sup>27,36</sup>, whereas others have only reported occasional or non-significant  
382 facilitation occurring beyond 200ms after the suprathreshold conditioning stimulus,  
383 ie. in the period immediately following LICI (Valls-Sole et al, 1992). In our search  
384 procedure (to decide upon the optimum conditioning stimulus (CS) intensities), we  
385 prioritized SICI and LICI, finding a CS intensity that elicited as close to 50%  
386 inhibition of the test MEP as possible. We tested intensities between 106-114% RMT  
387 for LICI (and above or below this if no appropriate inhibition was found), and applied  
388 these parameters also to LCD (such that the only difference between the LCD and  
389 LICI protocols was the ISI). This may simply have been too low to elicit strong LCD  
390 at rest. Other studies have reported no LCD at 110% RMT, neither at rest<sup>27</sup> nor with  
391 contraction<sup>37</sup>. It is nonetheless interesting that the lack of LCD at rest in the current  
392 study was overshadowed by the strong facilitation observed while in the TMS-  
393 feedback induced UP state, indicating that future indepth investigation into this effect  
394 with a larger range of conditioning stimulus intensities may be warranted.

395  
396  
397  
398

399 ***Different excitability states cause distinct neural dynamics in motor cortex***

400

401 We observed significant modulation of the alpha and gamma rhythms close to  
402 M1 of the trained hemisphere. Focusing on data from the recording electrode closest  
403 to each individual's hotspot revealed a significant association between low alpha and  
404 high gamma power for the UP versus DOWN state. Trial-by-trial modulation of these  
405 rhythms correlated significantly with MEP amplitude, and a support vector machine  
406 (SVM) classifying the two states based on EEG data ranked the high gamma and high  
407 alpha band as the two top features characterizing the distinction. Our observation of  
408 reciprocal changes in the alpha and gamma band are in line with previous studies  
409 using transcranial as well as intracranial recording methods<sup>1</sup>. The 'pulsed inhibition'  
410 theory suggests that repeated bursts of inhibitory alpha activity serve to temporarily  
411 silence gamma oscillations<sup>1</sup>. Thus, these two rhythms are seen to exhibit a reciprocal  
412 relationship, whereby when alpha is high, gamma is low. In periods of high alpha,  
413 gamma may still burst periodically, but only at the troughs of the oscillation cycle,  
414 meaning that the gamma 'duty cycle' (window for neural processing) is short, and  
415 only brief messages can be sent. By contrast, in periods of low alpha power, the  
416 gamma duty cycle is longer, and more extensive neuronal processing and inter-  
417 regional communication may occur. Our finding of increased gamma activity is also  
418 consistent with previous animal literature, showing that the pharmacological removal  
419 of GABA<sub>B</sub>-mediated inhibition (by receptor blockage) in rats results in increased  
420 gamma oscillations<sup>38</sup> which have been shown to be largest in M1's layer V<sup>39</sup>.

421

422 Gamma has often been considered difficult to detect using scalp electrodes  
423 because it is highly localised<sup>40</sup> and may also reflect non-cortical sources when  
424 recorded with EEG<sup>41,42</sup>. However, it is tempting to speculate that, in our experiment,  
425 gamma activity was strongly synchronized as a consequence of the neurofeedback  
426 training, where participants learned to substantially facilitate corticomotor excitability  
427 while keeping EMG activity constant, such that EMG amplitude differed only  
428 minimally between the UP and DOWN conditions. This suggestion is in line with  
429 previous neurofeedback studies that provided direct feedback of gamma activity,  
430 showing that gamma power could be upregulated to a substantial amount which even  
431 exceeded power values observed during movement execution<sup>15,43</sup>. By keeping the

432 visual feedback for the two conditions identical, we ensured that differences in eye  
433 movements between the UP and DOWN states were minor. As we were particularly  
434 interested in gamma oscillations, we additionally performed all EEG recordings in an  
435 electromagnetically shielded room, using a gel-based electrode system to maximize  
436 signal to noise ratio.

437

438 Previous studies have taken a correlational approach to investigating the  
439 relationships between brain rhythms and corticomotor excitability. These have shown  
440 that low alpha <sup>4,44</sup> or beta power <sup>45</sup> as well as high gamma power <sup>3</sup> during natural  
441 fluctuations at rest are associated with larger MEP amplitudes. We confirm and  
442 extend these results by introducing causality to this relationship for the first time,  
443 showing that experimentally driving excitability into two distinct states causes  
444 specific patterns of neural dynamics in the volitionally controlled cortical area.

445

446 While changes in alpha and gamma were specific to the hemisphere from  
447 which feedback was provided, theta showed a bilateral pattern of modulation, being  
448 higher in the DOWN than the UP state in motor areas in both hemispheres. While  
449 mid-frontal theta activity has been linked to error monitoring <sup>46</sup> the role of lateralized  
450 theta activity close to the sensorimotor hotspot electrode and its symmetric  
451 counterpart is less clear. Slower rhythms exert effects over larger distances, and are  
452 thought to be involved in long-range communication <sup>40</sup>. A similar pattern of  
453 upregulation and downregulation was observed in the homologous muscle in the  
454 opposite limb, albeit weaker and not statistically significant. This is likely a reflection  
455 of the extensive transcallosal structural connectivity and functional coupling of  
456 homologous regions of the cortical motor network <sup>47-49</sup>. It is tempting to speculate that  
457 the bilateral theta activity observed in the current study served to regulate the  
458 inhibition/facilitation of functional coupling or ‘spillover’ of activation from motor  
459 areas in the target hemisphere to their homologous counterparts.

460

461

462 Surprisingly we did not observe differential modulation of the Beta band,  
463 which is the predominant oscillatory frequency in sensorimotor cortical regions <sup>50,51</sup>.  
464 It typically desynchronizes (together with alpha) during motor execution and motor

465 imagery<sup>52-55</sup> and has been associated with corticomotor excitability at rest<sup>3</sup>. As our  
466 results represent the direct contrast between the UP and DOWN states, the lack of  
467 Beta involvement may firstly be due to the fact that both conditions involved a mental  
468 strategy targeted at the sensorimotor system and, secondly, that no temporal structure  
469 was imposed so that we could not perform analyses which are, for example, time-  
470 locked to the potential onset of these mental strategies. However, our data further  
471 confirm that the two ‘inhibitory’ rhythms alpha and beta might serve different  
472 functions in selecting and activating the appropriate sensorimotor representations<sup>56</sup>.

473

474

### 475 *Conclusion and future applications*

476

477 Here we present an innovative approach to voluntarily and bidirectionally change the  
478 state of the motor cortex, by directly targeting MEP amplitudes in a neurofeedback  
479 paradigm. This method provided a unique opportunity to reveal the oscillatory and  
480 neurochemical underpinnings of the two distinct trained brain states, using concurrent  
481 TMS EEG measurements, and mechanistic follow-up investigations using paired-  
482 pulse TMS. The results comparing UP and DOWN states indicate that voluntary  
483 upregulation of corticomotor excitability causes increased presynaptic GABA<sub>B</sub>-  
484 mediated disinhibition, elevated neural oscillations in the gamma frequency range,  
485 and reduced alpha and theta rhythms.

486 This paves the way for new technologies that allow the user to regulate aspects  
487 of their own brain function in order to reach desired states that are, for example,  
488 associated with enhanced motor performance. In the context of stroke rehabilitation,  
489 training volitional modulation of corticomotor excitability may hold promise as a  
490 rehabilitative therapy early after stroke, i.e. when patients are deprived of  
491 rehabilitation training because they are unable to execute overt movements with the  
492 impaired upper limb. As it is known that LCD is recruited during actual movement  
493<sup>28,57,58</sup>, the elevated LCD we observed in the UP condition may reflect that the  
494 neurofeedback had engaged similar mechanisms to those involved in movement  
495 execution, using only voluntary endogenous processes. Furthermore, as pathological  
496 hyperexcitability of the non-damaged hemisphere has been hypothesized to limit  
497 recovery in some patients<sup>59</sup>, the TMS-neurofeedback protocol can be individually

498 tailored either to upregulate the damaged hemisphere, down-regulate the intact  
499 hemisphere, or a combination of both, depending on the patient's specific needs.

500

501

502

503

#### 504 **FIGURE LEGENDS**

505

506 **Figure 1. Outline of experimental setup.** Each trial of neurofeedback training  
507 commenced with a display of four circles (A), each representing the background  
508 EMG in one of the recorded hand muscles (right FDI, ADM and OP, and left FDI).  
509 The circles were red if the root mean squared (rms) EMG at rest was greater than 7  
510 microvolts. It was essential that all four circles were green for at least 500ms before  
511 the trial could proceed. When this condition was met a fixation cross appeared for a  
512 random period (in order to prevent anticipation of the TMS pulse). During the fixation  
513 cross, it was still essential to keep the background EMG below 7 microvolts in order  
514 for a TMS pulse to be delivered. (B) The peak-peak amplitude of the motor evoked  
515 potential (MEP) evoked by the TMS was calculated in real-time and displayed  
516 immediately to the participant on screen in the form of a rectangular bar.  
517 (C) Different feedback for UP training and DOWN training. In the UP training If the  
518 MEP was greater than the baseline mean, the rectangle was green, with a green tick, a  
519 dollar sign to indicate a small financial reward, a display of the current score, and a  
520 positive encouraging sound bite was heard. If the MEP did not meet the criterion  
521 amplitude, the bar was red, there was no dollar sign, and a negative sound bite was  
522 heard. (D) A custom 3D printed 'coil spacer' device was used to prevent direct  
523 contact of the TMS coil on the EEG electrodes and allow the pre-TMS EEG period to  
524 be recorded artefact free.

525

526 **Figure 2. MEP amplitudes during neurofeedback.** Panel A depicts MEP amplitude  
527 in millivolts during the two types of MEP neurofeedback. UP training is shown in  
528 orange and DOWN training in blue, across all 10 training blocks. Filled triangles  
529 labelled 'BS' indicate the baseline measurement block that occurred at the beginning  
530 of that particular session, prior to any neurofeedback. Dotted vertical lines indicate  
531 the separation of the blocks into different 'sessions', which occurred on separate days.  
532 Panel B shows the same data for the control group who received no veridical

533 neurofeedback. Panel C shows the UP-DOWN difference (in the normalised %  
534 change from baseline data) for each block in the experimental group and the control  
535 group. Higher values represent greater deviations between the UP and DOWN data  
536 points and therefore more modulation of MEP amplitude. Thus, these values are  
537 significantly higher in the experimental group than in the control group. # symbols  
538 indicate blocks in which the Cohen's *d* effect size for the difference between the  
539 experimental and control group was large-very large (>0.8). All data are shown as  
540 mean  $\pm$ SEM.

541

542 **Figure 3. Retention, aftereffects and feedback-free measurements.** Filled bars  
543 represent blocks of neurofeedback, and unfilled bars represent MEPs collected at rest.  
544 Panel A shows MEP amplitudes with their preceding resting baseline values  
545 subtracted. Values above 0 represent increases relative to baseline, and below 0  
546 represent decreases. State-dependent neurofeedback training feedback effects were  
547 still evident in a retention block carried out approximately 6 months following the  
548 initial experiment. No aftereffects were observed on resting MEP amplitude 5 and 10  
549 minutes later. In a separate block participants were capable of upregulating and  
550 downregulating MEP amplitudes with feedback removed (FB free). MEPs measured  
551 from the opposite hemisphere during neurofeedback exhibited a similar pattern of  
552 modulation.

553

554 **Figure 4. Investigation into mechanisms of MEP neurofeedback.** The data show  
555 paired pulse TMS measurements taken during neurofeedback blocks to probe distinct  
556 neurophysiological processes. In all subsequent panels, unfilled bars represent  
557 baseline MEP amplitudes collected at rest prior to the block. Panel A Shows that MEP  
558 amplitudes from the single pulses (from which neurofeedback was provided)  
559 exhibited the same state-dependent modulation as observed previously. In Panel B  
560 MEP amplitudes are expressed as a percentage of the single pulse MEPs. While  
561 expected levels of inhibition were observed for both SICI and LICI paired pulses,  
562 there was no state-dependent modulation. LCD was, however, significantly increased  
563 in the UP condition relative to baseline, and relative to the DOWN condition.

564

565



566 **Figure 5. Neural oscillations associated with the trained brain states.** Panels b-f  
567 show topographical representations of the relative power (in % of whole spectrum) in  
568 the UP condition minus the DOWN condition, for 5 distinct frequency bands  
569 (Averaged group data, n=14, 3 other frequency bands shown in Supplementary Fig 3).  
570 Red colours indicate regions that demonstrated greater synchronisation in the UP  
571 condition. Blue colours indicate greater synchronization in the DOWN condition. The  
572 location of the electrode nearest to the TMS hotspot varied between participants but  
573 was always within the region indicated in a). Colours are scaled from blue-red by  
574 minimum-maximum (range shown to right of each plot). Panel g shows the same data  
575 (UP-DOWN) extracted for each participant's hotspot electrode. Values greater than 0  
576 indicate larger amplitude oscillations in the UP condition, and lower than 0 indicate  
577 larger oscillations in the DOWN condition. Stars indicate significant deviations from  
578 0 (Wilcoxon Signed Rank tests). Panel h shows group level data for regression  
579 analyses performed on MEP amplitudes with relative power in each frequency band.  
580 This included all 120 trials (60 UP, 60 DOWN) collected during the combined TMS-  
581 EEG recording session. The Y axis depicts the slope of the regression model. Stars  
582 indicate significant deviations from 0 (0 would indicate no slope, Wilcoxon Signed  
583 Rank test). Individual regression plots are shown for one representative participant in  
584 Supplementary Fig. 4.

585

586

587

588

## 589 **Materials and Methods**

590

### 591 *Participants*

592

593 Fifteen healthy volunteers (age  $23 \pm 3.14$  s.d, 7 female) participated in the  
594 experimental group. An additional thirteen participants (age  $25 \pm 3.06$  s.d, 3 female)  
595 formed a control group. All participants were right handed according to the Edinburgh  
596 Handedness Inventory<sup>60</sup>, and gave informed consent to procedures. The experiments  
597 were approved by the Kantonale Ethikkommission Zürich, and were conducted in  
598 accordance with the Declaration of Helsinki (1964).

599

600

601 *TMS-based neurofeedback*

602

603 Participants undertook five sessions of TMS-based neurofeedback, on separate  
604 days. The first four days comprised of neurofeedback training, and on the fifth day  
605 neurofeedback was performed with simultaneous electroencephalography (EEG)  
606 recording to investigate state specific neural dynamics. On two of the training days  
607 neurofeedback was adjusted so that a rewarding visual stimulus was displayed when  
608 MEPs were larger than baseline (the ‘UP’ condition) and on the other two days, the  
609 rewarding stimulus was displayed when MEPs were smaller than baseline (the  
610 ‘DOWN’ condition). On each of the training days, 4 separate blocks of neurofeedback  
611 were performed, each comprising of 30 individual MEP feedback trials (total 120  
612 trials per day). The format of individual trials and feedback is described in more detail  
613 below. Baseline corticospinal excitability was measured on each day prior to training  
614 (20 MEPs) and post-measurements were taken during the rest periods between each  
615 of the 4 blocks (12 MEPs per measurement).

616

617 Subjects sat in a comfortable chair with both arms and legs resting in a neutral  
618 position supported by foam pillows. Surface electromyography (EMG, Trigno  
619 Wireless; Delsys) was recorded from right First Dorsal Interosseous (FDI), Abductor  
620 Digiti Minimi (ADM), Opponens Pollicis (OP), and left FDI. EMG data were  
621 sampled at 2000Hz (National Instruments, Austin, Texas), amplified and stored on a  
622 PC for off-line analysis.

623 TMS was performed with a figure-of-eight coil (internal coil diameter 50mm)  
624 connected to a Magstim 200 stimulator (Magstim, Whitland, UK). The coil was held  
625 on the left hemisphere over the ‘hotspot’ of the right FDI at the location with the  
626 largest and most consistent MEPs, and with the optimal orientation for evoking a  
627 descending volley in the corticospinal tract (approximately 45 degrees from the  
628 sagittal plane in order to induce posterior-anterior current flow). Once the hotspot was  
629 established, the lowest stimulation intensity at which MEPs with peak-to-peak  
630 amplitude of approximately 50 $\mu$ V were evoked in at least 5 of 10 consecutive trials  
631 was taken as Resting Motor Threshold (RMT).

632 The stimulation intensity used to evoke MEPs during the experiment was  
633 chosen using the following procedure in order to obtain a baseline MEP amplitude  
634 that was 50% of the participant's maximum. A recruitment curve<sup>eg. 61</sup> was performed  
635 at the beginning of the first experimental session, whereby 6 TMS pulses were  
636 applied at 10 different intensities relative to RMT (90%, 100%, 110%, 120%, 130%,  
637 140%, 150%, 160%, 180%, 190%) in a randomized order. MEP amplitude at each  
638 intensity was plotted to determine the point on the curve at which plateau occurs and  
639 the MEPs do not continue to increase. Maximal MEP amplitude was recorded, and the  
640 intensity required to evoke 50% of this amplitude was used for all subsequent testing.  
641 With this approach, there was scope for MEP amplitude to both increase and decrease  
642 to similar extents from this 'intermediate' value. Post-hoc analyses revealed that this  
643 procedure resulted in an average stimulation intensity corresponding to 130% RMT.  
644 Immediately following this procedure and prior to the first block of neurofeedback, 20  
645 MEPs were collected at rest at the chosen intensity to determine 'baseline'  
646 corticospinal excitability. The mean MEP amplitude at baseline was recorded and  
647 used during neurofeedback to establish the criterion amplitude that determined  
648 whether participants received either positive or negative feedback.

#### 649 *Format of neurofeedback*

650 Neurofeedback was performed using custom written MATLAB software.  
651 Participants kept eyes open with attention directed to a monitor in front of them. They  
652 were instructed to relax their limbs and avoid tensing any muscles throughout the  
653 experiment. In order to ensure that MEP amplitude could not be influenced by  
654 background muscle activation, the root mean square (rms) of the EMG signal for each  
655 muscle for the previous 100ms of data was calculated and displayed in real-time on  
656 screen at the beginning of each trial in the form of four coloured 'traffic lights',  
657 representing each muscle (Fig. 1A). If the background EMG in a muscle exceeded  
658  $7\mu\text{V}$ , the corresponding light turned red. Participants were instructed that a trial could  
659 not begin unless all four lights were green (all muscles relaxed below  $7\mu\text{V}$ ) for at least  
660 a continuous 500ms period. When a trial commenced the traffic lights disappeared,  
661 but background EMG continued to be monitored and the trial was automatically  
662 paused if any muscle exceeded the threshold. At the beginning of each trial a fixation  
663 cross appeared in the center of the screen. After a variable period of time (between 5.5

664 - 8.5 seconds, or longer if muscle activation delayed the trial) a TMS pulse was fired.  
665 The MEP amplitude for the target muscle (right FDI) was immediately measured and  
666 displayed to the participant on screen within 500ms. The display consisted of a  
667 vertical bar indicating MEP amplitude relative to a horizontal line in the middle of the  
668 screen representing the mean recorded at baseline (Fig. 1B). In ‘UP’ sessions if the  
669 MEP was larger than the criterion amplitude, the bar was shown as green with a tick  
670 beside it, a positive soundbyte was heard, and a number adjacent to a dollar sign  
671 incremented to indicate that a small financial reward had been gained. If the MEP was  
672 smaller than the criterion amplitude, the bar was red with a cross beside it, a negative  
673 soundbyte was heard, and no financial reward was shown. The reverse was true in the  
674 ‘DOWN’ sessions (Fig. 1C). The feedback remained on screen for 4 seconds, before  
675 being replaced by the traffic lights display preceding the next trial. Participants were  
676 instructed to attend to the feedback and that the goal was to increase (or decrease) the  
677 size of the MEP represented by the bar. Prior to the experiment participants read an  
678 instruction sheet explaining the procedures above and providing recommended mental  
679 strategies that were reported in previous literature in which corticospinal excitability  
680 was downregulated<sup>29</sup> and upregulated<sup>31</sup> by motor imagery (Specific task instructions  
681 are provided in Supplementary Material). Initially the criterion amplitude  
682 corresponded to the baseline MEP measure. After each block of 30 MEPs,  
683 performance was quantified and the task difficulty was adjusted if necessary. If the  
684 success rate was >70% difficulty was increased by raising (or lowering in the DOWN  
685 condition) the criterion MEP amplitude that needed to be reached by 10% in order for  
686 the positive reward to be presented. If performance was > 90%, this was adjusted by  
687 20%.

#### 688 *EEG session*

689

690 On the fifth day neurofeedback was provided during simultaneous EEG  
691 recording. The participant’s TMS hotspot was determined and marked on the scalp  
692 prior to EEG capping. EEG signals were recorded using a 64 channel gel-based TMS-  
693 compatible cap (Electrical Geodesics Inc., Oregon, USA), and the channel closest to  
694 the TMS hotspot was noted. EEG data were amplified and sampled at 1000hz. In  
695 order to minimize artefacts associated with the direct contact of the TMS coil resting  
696 on the electrodes of the EEG cap, we designed and 3D-printed a custom plastic ‘coil

697 spacer' device <sup>62</sup>, which has four wide legs positioned to provide a platform  
698 distributing the weight of the TMS coil, so that it hovers over the electrodes without  
699 contact (Fig. 1D). This allowed quality recordings to be obtained even from the  
700 channel of interest closest to the participant's 'hotspot'. The participants RMT was  
701 established while wearing the EEG cap with TMS coil spacer, and the same % above  
702 threshold that was used for all previous sessions was applied for neurofeedback.  
703 Impedances were monitored throughout and maintained below 50k $\Omega$ .

704

705 Baseline corticospinal excitability was measured in the same fashion as for the  
706 first four sessions, followed by two blocks of neurofeedback (UP or DOWN,  
707 counterbalanced) with brief (12 MEP) post measurements following each. After the  
708 final post measurement, a 15 minute rest break was scheduled for the participant.  
709 Following this, the procedure was repeated and baseline excitability was measured  
710 again, followed by two blocks of either UP or DOWN neurofeedback (whichever was  
711 not performed in the first half of the session). At the end of this session participants  
712 were debriefed.

713

714 *Control group*

715

716 Participants were blinded as to whether they were allocated to the experimental  
717 or control group. The control group experienced identical conditions to the  
718 experimental group, with the exception that direct neurofeedback was not provided.  
719 The visual feedback bar demonstrating MEP amplitude was always the same height  
720 (reaching the 'mean' horizontal line). 'Positive' feedback/rewards were presented in  
721 the same proportion as in the experimental group (66% of all trials - calculated upon  
722 completion of experimental group), but at a fixed and predictable rate in order to  
723 prevent the development of illusory correlations. Participants were instructed to attend  
724 to the visual feedback on screen, and that rewards would occur at a fixed rate. Aside  
725 from this, they were otherwise given identical instructions as the participants in the  
726 experimental group- i.e. the same recommended mental strategies were provided on  
727 control 'UP' and 'DOWN' blocks.

728

729 ***Data processing and analysis***

730

731 *MEP data*

732  
733       EMG data from all four hand muscles were band-pass filtered (30–800 Hz),  
734 separately for the portion of data containing the 100ms of ‘pre-TMS’ background  
735 EMG, and for the portion of EMG containing the MEP, in order to prevent smearing  
736 of the MEP into the background EMG data chunk. The root mean squared (rms) of  
737 the background EMG was calculated, and peak-peak MEP amplitude was measured.  
738 Trimming (removal) of the maximum and minimum MEP in each block was  
739 performed in order to screen out extreme values. MEP amplitude is known to be  
740 modulated by EMG background activation<sup>23,24</sup>. Therefore, the rms pre-stimulus EMG  
741 recordings were used to assess the presence of unwanted background EMG activity in  
742 the period 110 to 10ms preceding the magnetic pulse. MEPs preceded by background  
743 EMG higher than 0.01mV were excluded. For each subject and over all trials we  
744 calculated the mean and standard deviation of the background EMG. MEPs that  
745 occurred when the background EMG value exceeded 2.5 standard deviations above  
746 the mean, and MEPs with a peak-to-peak amplitude which exceeded  $Q3 + 1.5 \times (Q3 -$   
747  $Q1)$  were removed from further analysis, with Q1 denoting the first quartile and Q3  
748 the third quartile computed over the whole set of trials for each subject.

749  
750       Inferential statistics were computed using Mixed Effects Models in SPSS  
751 (Version 16.0, SPSS Inc. Chicago, US), as they account for covariances between  
752 related data samples in repeated measures designs, and have greater flexibility for  
753 modeling effects over time than traditional ANOVA approaches<sup>63</sup>. Fitting of the  
754 mixed effects models employed restricted maximum likelihood estimation (REML)  
755 and a compound symmetry covariance matrix. Model fit indices (Akaike Information  
756 Criterion and Schwarz Bayesian Criterion) were considered prior to choosing the  
757 covariance matrix and model type. Fixed effects were *neurofeedback type* (UP or  
758 DOWN) and *block number* (1-10). The influence of each of the fixed effects on the  
759 model was estimated using *F* tests. In all models *subject* was designated as a random  
760 effect with random intercepts.

761       The criterion alpha value was set to 0.05 for all inferential tests. In cases where  
762 multiple comparisons were performed, *p* values were false discovery rate (FDR)  
763 corrected.

764  
765

766 *EEG data*

767

768 Signals from all 64 channels were first epoched to extract only the data on each  
769 trial from the 4 seconds before the TMS pulse. This was to remove the substantial  
770 artefacts that arise during the magnetic pulses, prior to conducting any filtering or  
771 further processing. These separate chunks of unpolluted data were then concatenated  
772 into one continuous epoch, and highpass filtered at 1Hz, prior to conducting an  
773 independent components analysis (ICA). Independent components were visualized  
774 and those containing artefacts arising from eye movements, facial EMG, cardiac  
775 signals, bad channels or other non-brain activity related signals were removed.

776 The cleaned data were average-referenced, and re-epoched into chunks of data  
777 containing only the 1.5s on each trial prior to the TMS pulse (ie. to capture the  
778 ongoing oscillatory activity at the instance in which the TMS occurred, while the  
779 fixation cross was on screen and the ‘traffic lights’ had disappeared).

780 A power spectrum was computed for each single epoch and the mean power (and  
781 relative power) in each of the relevant bandwidths were extracted (delta (0.1-4Hz),  
782 theta (5-7Hz), low alpha (8-10Hz), high alpha (11-13Hz), low beta (14-21Hz), high  
783 beta (22-30Hz), low gamma (31-50Hz) and high gamma (51-80Hz). Power values  
784 were computed separately for UP and DOWN trials, and non-parametric Wilcoxon  
785 signed rank tests (with FDR correction) were used to compare neural oscillations in  
786 these two states.

787

788 We also analysed whether trial-by-trial variation of EEG data was associated with  
789 trial-by-trial variation of MEP amplitudes. Therefore, relative power in each  
790 bandwidth for each epoch was entered into a multiple regression model with MEP  
791 amplitudes measured in the muscle from which neurofeedback was provided (right  
792 FDI). The beta (slope) values resulting from each regression model for each  
793 participant were forwarded into a group-level analysis.

794

795 *Classification of distinct brain states*

796

797 Individual epochs of EEG data (60 UP 60 DOWN) were classified by a linear support  
798 vector machine (SVM, 10-fold cross validation), to test separately for each participant  
799 whether the epochs could be successfully predicted as ‘UP’ state or ‘DOWN’ state  
800 based solely on the power values (scaled by using 1/f transformed relative power) of

801 the 4 frequency bands of interest. The SVM was chosen as it is known to perform  
802 particularly well in BCI settings using EEG data which is noisy and has features that  
803 are correlated. In order to validate the results the same procedure was repeated with  
804 randomly permuted labels, and this null model was statistically compared to the  
805 model with true labels ( $C=1$ ). Feature selection was conducted using feature ranking  
806 based on Recursive Feature Elimination <sup>64</sup>.

807

### 808 *Follow-up experiment 6 months later*

809

810 A sub-set of 11 participants from the experimental group returned approximately 6  
811 months later to participate in a follow-up experiment probing retention and  
812 mechanisms underlying the two distinct states. This was conducted over a further 4  
813 days of testing. On one day, retention, aftereffects, and excitability in the opposite  
814 ‘untrained’ hemisphere were tested for the ‘UP’ condition. On another,  
815 neurophysiological mechanisms were probed using paired pulse TMS. These two days  
816 were repeated for the ‘DOWN’ condition, and the order of these sessions was  
817 counterbalanced. We additionally tested whether trained participants were able to  
818 upregulate and downregulate when feedback was temporarily removed.

819

### 820 *Retention testing & aftereffects measurement*

821 After a 6-month break and no top-up training, participants were tested with one block  
822 of TMS-neurofeedback (20 MEPs) in order to assess retention of learning. All other  
823 procedures were identical to those carried out in the main experiment.

824 Following this block, 12 MEPs were collected at rest after 5 and 10 minutes.

825

### 826 *Excitability in the opposite hemisphere*

827

828 During one block, two TMS coils were used, placed over the right and left motor  
829 hotspots (as described previously). This block contained 40 trials, 20 of which were  
830 normal TMS neurofeedback trials. The other 20 were trials where TMS was applied  
831 to the opposite hemisphere, rather than to the hemisphere that was the target for  
832 neurofeedback. No feedback was given in these trials. The presentation of left and  
833 right hemisphere TMS pulses was randomized.

834

### 835 *Feedback-free measurements*



836

837 We additionally tested whether trained participants were able to upregulate and  
838 downregulate when feedback was temporarily removed. In this feedback-free block,  
839 the timing of trials and participant instructions were identical to normal  
840 neurofeedback blocks, but in place of the usual feedback bar showing MEP  
841 amplitude, the white fixation cross simply turned red during this period. The onset of  
842 trials was still contingent on muscles being completely relaxed, and the traffic lights  
843 display still preceded every trial.

844

845 *Paired pulse TMS measurements*

846

847 On separate days (one ‘UP’ one ‘DOWN’) from the measurements described above,  
848 we performed three additional blocks of TMS neurofeedback (24 trials per block x 3  
849 = 72 total trials), in which just 25% of trials were standard single pulse TMS-  
850 neurofeedback trials, with the usual feedback. The remaining trials contained paired  
851 pulses in place of the usual single pulse TMS. For all paired pulse measurements, the  
852 test stimulus intensity was identical to that which had been chosen for the TMS  
853 neurofeedback (ie. that produced MEPs that were 50% of the maximum on the  
854 recruitment curve). On 25% of trials Short Interval Intracortical Inhibition (SICI) was  
855 measured. This was with a conditioning stimulus intensity that was chosen using a  
856 personalized search procedure testing intensities ranging from 50%-90% RMT, to  
857 achieve as close to 50% inhibition as possible, and an inter-stimulus interval of  
858 1.97ms<sup>65</sup>. The reduction in the size of the test MEP is believed to represent  
859 postsynaptic GABA<sub>A</sub> inhibition<sup>25</sup>. On 25% of trials Long Interval Intracortical  
860 Inhibition (LICI) was measured. This was with two suprathreshold pulses, with the  
861 conditioning stimulus intensity chosen using a search procedure between 106-114%  
862 RMT, and an inter-stimulus interval of 100ms<sup>27</sup>. This is believed to reflect  
863 postsynaptic GABA<sub>B</sub> inhibition<sup>66</sup>. On the remaining 25% of trials, Late Cortical  
864 Disinhibition (LCD) was tested. This was with the exact same pulse intensities as  
865 used for LICI, but with a 220ms inter-stimulus interval<sup>27</sup>, and is thought to measure  
866 presynaptic GABA<sub>B</sub> disinhibition<sup>26-28</sup>. The order of presentation of paired pulses and  
867 single pulses was randomized.

868

869 Baseline measurements were taken at rest with each of these three paired-pulse TMS  
870 protocols, prior to the beginning of neurofeedback blocks (20 of each type of paired  
871 pulse measurement, and 20 single pulse MEPs).

872

873

874 1

## 875 REFERENCES

876

- 877 1. Jensen, O. & Mazaheri, A. Shaping Functional Architecture by Oscillatory  
878 Alpha Activity: Gating by Inhibition. *Frontiers in human neuroscience* **4**,  
879 (2010).
- 880 2. Jensen, O. *et al.* Using Brain–Computer Interfaces and Brain-State  
881 Dependent Stimulation as Tools in Cognitive Neuroscience. *Front Psychol* **2**,  
882 (2011).
- 883 3. Zarkowski, P., Shin, C. J., Dang, T., Russo, J. & Avery, D. EEG and the  
884 Variance of Motor Evoked Potential Amplitude. *Clinical EEG and ...* (2006).
- 885 4. Sauseng, P., Klimesch, W., Gerloff, C. & Hummel, F. C. Spontaneous locally  
886 restricted EEG alpha activity determines cortical excitability in the motor  
887 cortex. *Neuropsychologia* **47**, 284–288 (2009).
- 888 5. Schaworonkow, N., Triesch, J., Ziemann, U. & Zrenner, C. EEG-triggered  
889 TMS reveals stronger brain state-dependent modulation of motor evoked  
890 potentials at weaker stimulation intensities. *bioRxiv* 251363 (2018).  
891 doi:10.1101/251363
- 892 6. Kelly, S. P., Gomez-Ramirez, M. & Foxe, J. J. The strength of anticipatory  
893 spatial biasing predicts target discrimination at attended locations: a high-  
894 density EEG study. *Eur. J. Neurosci.* **30**, 2224–2234 (2009).
- 895 7. Mazaheri, A., Nieuwenhuis, I. L. C., van Dijk, H. & Jensen, O. Prestimulus  
896 alpha and mu activity predicts failure to inhibit motor responses. *Hum Brain*  
897 *Mapp* **30**, 1791–1800 (2009).
- 898 8. Schubert, R., Blankenburg, F., Lemm, S., Villringer, A. & Curio, G. Now you  
899 feel it--now you don't: ERP correlates of somatosensory awareness.  
900 *Psychophysiology* **43**, 31–40 (2006).
- 901 9. Zaehle, T., Rach, S. & Herrmann, C. S. Transcranial alternating current  
902 stimulation enhances individual alpha activity in human EEG. *PLoS ONE* **5**,  
903 e13766 (2010).
- 904 10. Buch, E. *et al.* Think to move: a neuromagnetic brain-computer interface  
905 (BCI) system for chronic stroke. *Stroke* **39**, 910–917 (2008).
- 906 11. Caria, A. *et al.* Chronic stroke recovery after combined BCI training and  
907 physiotherapy: A case report. *Psychophysiology* **48**, 578–582 (2010).
- 908 12. Machado, S. *et al.* EEG-based brain-computer interfaces: an overview of  
909 basic concepts and clinical applications in neurorehabilitation. *Reviews in the*  
910 *Neurosciences* **21**, 451–468 (2010).
- 911 13. Maulden, S. A., Gassaway, J., Horn, S. D., Smout, R. J. & DeJong, G.  
912 Timing of Initiation of Rehabilitation After Stroke. *Arch Phys Med Rehabil*  
913 **86**, 34–40 (2005).

- 914 14. Fetz, E. E. Volitional Control of Cortical Oscillations and Synchrony. *Neuron*  
915 77, 216–218 (2013).
- 916 15. Engelhard, B., Ozeri, N., Israel, Z., Bergman, H. & Vaadia, E. Inducing  
917 Gamma Oscillations and Precise Spike Synchrony by Operant Conditioning  
918 via Brain-Machine Interface. *Neuron* (2013).
- 919 16. Mellinger, J. *et al.* An MEG-based brain-computer interface (BCI).  
920 *Neuroimage* 36, 581–593 (2007).
- 921 17. Soekadar, S. R., Witkowski, M., Birbaumer, N. & Cohen, L. G. Enhancing  
922 Hebbian Learning to Control Brain Oscillatory Activity. *Cerebral Cortex*  
923 (2014). doi:10.1093/cercor/bhu043
- 924 18. Sitaram, R. *et al.* Closed-loop brain training: the science of neurofeedback.  
925 *Nat Rev Neurosci* 18, 86–100 (2017).
- 926 19. Thompson, A. K., Chen, X. Y. & Wolpaw, J. R. Acquisition of a Simple  
927 Motor Skill: Task-Dependent Adaptation Plus Long-Term Change in the  
928 Human Soleus H-Reflex. *J. Neurosci.* 29, 5784–5792 (2009).
- 929 20. Fries, P. A mechanism for cognitive dynamics: neuronal communication  
930 through neuronal coherence. *Trends Cogn. Sci. (Regul. Ed.)* 9, 474–480  
931 (2005).
- 932 21. Grosse-Wentrup, M., Schölkopf, B. & Hill, J. Causal influence of gamma  
933 oscillations on the sensorimotor rhythm. *Neuroimage* 56, 837–842 (2011).
- 934 22. Carson, R. G., Ruddy, K. L. & McNickle, E. *What do TMS evoked motor*  
935 *potentials tell us about motor learning?* (2016).
- 936 23. Hess, C. W., Mills, K. R. & Murray, N. M. Magnetic stimulation of the  
937 human brain: facilitation of motor responses by voluntary contraction of  
938 ipsilateral and contralateral muscles with additional observations on an  
939 amputee. *Neurosci Lett* 71, 235–240 (1986).
- 940 24. Devanne, H., Lavoie, B. A. & Capaday, C. Input-output properties and gain  
941 changes in the human corticospinal pathway. *Exp Brain Res* 114, 329–338  
942 (1997).
- 943 25. Fisher, R. J., Nakamura, Y., Bestmann, S., Rothwell, J. C. & Bostock, H.  
944 Two phases of intracortical inhibition revealed by transcranial magnetic  
945 threshold tracking. *Exp Brain Res* 143, 240–248 (2002).
- 946 26. Cash, R. F. H., Ziemann, U. & Thickbroom, G. W. Inhibitory and  
947 disinhibitory effects on I-wave facilitation in motor cortex. *Journal of*  
948 *Neurophysiology* 105, 100–106 (2011).
- 949 27. Cash, R. F. H., Ziemann, U., Murray, K. & Thickbroom, G. W. Late cortical  
950 disinhibition in human motor cortex: a triple-pulse transcranial magnetic  
951 stimulation study. *Journal of Neurophysiology* 103, 511–518 (2010).
- 952 28. Caux-Dedeystère, A., Derambure, P. & Devanne, H. Late cortical  
953 disinhibition in relaxed versus active hand muscles. *Neuroscience* 298, 52–62  
954 (2015).
- 955 29. Majid, D. S. A., Lewis, C. & Aron, A. R. Training voluntary motor  
956 suppression with real-time feedback of motor evoked potentials. *Journal of*  
957 *Neurophysiology* 113, 3446–3452 (2015).
- 958 30. Stinear, C. M., Byblow, W. D., Steyvers, M., Levin, O. & Swinnen, S. P.  
959 Kinesthetic, but not visual, motor imagery modulates corticomotor  
960 excitability. *Exp Brain Res* 168, 157–164 (2005).
- 961 31. Izumi, S. *et al.* Facilitatory effect of thinking about movement on motor-  
962 evoked potentials to transcranial magnetic stimulation of the brain. *American*  
963 *Journal of Physical Medicine & Rehabilitation* 74, 207–213 (1995).

- 964 32. Fadiga, L. *et al.* Corticospinal excitability is specifically modulated by motor  
965 imagery: a magnetic stimulation study. *Neuropsychologia* **37**, 147–158  
966 (1998).
- 967 33. Magill, R. *Motor Learning and Control: Concepts and Applications*.  
968 (McGraw-Hill Education, 2010).
- 969 34. Mott, D. D. & Lewis, D. V. Facilitation of the induction of long-term  
970 potentiation by GABAB receptors. *Science* **252**, 1718–1720 (1991).
- 971 35. Sanger, T. D., Garg, R. R. & Chen, R. Interactions between two different  
972 inhibitory systems in the human motor cortex. *The Journal of Physiology*  
973 **530**, 307–317 (2004).
- 974 36. Chong, B. W. X. & Stinear, C. M. Modulation of motor cortex inhibition  
975 during motor imagery. *Journal of Neurophysiology* **117**, 1776–1784 (2017).
- 976 37. Claus, D., Weis, M., Jahnke, U., Plewe, A. & Brunhölzl, C. Corticospinal  
977 conduction studied with magnetic double stimulation in the intact human. *J.*  
978 *Neurol. Sci.* **111**, 180–188 (1992).
- 979 38. Leung, L. S. & Shen, B. GABAB receptor blockade enhances theta and  
980 gamma rhythms in the hippocampus of behaving rats. *Hippocampus* **17**, 281–  
981 291 (2007).
- 982 39. Johnson, N. W. *et al.* Phase-amplitude coupled persistent theta and gamma  
983 oscillations in rat primary motor cortex in vitro. *Neuropharmacology* **119**,  
984 141–156 (2017).
- 985 40. Buzsaki, G. *Rhythms of the Brain*. (Oxford University Press, USA, 2006).
- 986 41. Yuval-Greenberg, S., Tomer, O., Keren, A. S., Nelken, I. & Deouell, L. Y.  
987 Transient induced gamma-band response in EEG as a manifestation of  
988 miniature saccades. *Neuron* **58**, 429–441 (2008).
- 989 42. Whitham, E. M. *et al.* Scalp electrical recording during paralysis:  
990 Quantitative evidence that EEG frequencies above 20 Hz are contaminated by  
991 EMG. *CLINICAL NEUROPHYSIOLOGY* **118**, 1877–1888 (2007).
- 992 43. Miller, K. J. *et al.* Cortical activity during motor execution, motor imagery,  
993 and imagery-based online feedback. *Proceedings of the National Academy of*  
994 *Sciences* **107**, 4430–4435 (2010).
- 995 44. Zrenner, C., Desideri, D., Belardinelli, P. & Ziemann, U. Real-time EEG-  
996 defined excitability states determine efficacy of TMS-induced plasticity in  
997 human motor cortex. *Brain Stimul* **11**, 374–389 (2018).
- 998 45. Mäki, H. & Ilmoniemi, R. J. EEG oscillations and magnetically evoked motor  
999 potentials reflect motor system excitability in overlapping neuronal  
1000 populations. *CLINICAL NEUROPHYSIOLOGY* **121**, 492–501 (2010).
- 1001 46. Pezzetta, R., Nicolardi, V., Tidoni, E. & Aglioti, S. M. Error, rather than its  
1002 probability, elicits specific electrocortical signatures: a combined EEG-  
1003 immersive virtual reality study of action observation. *Journal of*  
1004 *Neurophysiology* jn.00130.2018 (2018). doi:10.1152/jn.00130.2018
- 1005 47. Ruddy, K. L., Leemans, A. & Carson, R. G. Transcallosal connectivity of the  
1006 human cortical motor network. *Brain Struct Funct* (2016). doi:DOI:  
1007 10.1007/s00429-016-1274-1
- 1008 48. Ruddy, K. L., Leemans, A., Woolley, D. G., Wenderoth, N. & Carson, R. G.  
1009 Structural and Functional Cortical Connectivity Mediating Cross Education  
1010 of Motor Function. *Journal of Neuroscience* **37**, 2555–2564 (2017).
- 1011 49. Ruddy, K. L. 2017. Directionality of interhemispheric communication.  
1012 *Springer*
- 1013

- 1014 50. Baker, S. N., Olivier, E. & Lemon, R. N. Coherent oscillations in monkey  
1015 motor cortex and hand muscle EMG show task-dependent modulation.  
1016 (1997).
- 1017 51. Murthy, V. N. & Fetz, E. E. Oscillatory activity in sensorimotor cortex of  
1018 awake monkeys: synchronization of local field potentials and relation to  
1019 behavior. *Journal of Neurophysiology* **76**, 3949–3967 (1996).
- 1020 52. Ramos-Murguialday, A. & Birbaumer, N. Brain oscillatory signatures of  
1021 motor tasks. *Journal of Neurophysiology* **113**, 3663–3682 (2015).
- 1022 53. Pfurtscheller, G. & Neuper, C. Motor imagery activates primary sensorimotor  
1023 area in humans. *Neurosci Lett* **239**, 65–68 (1997).
- 1024 54. Pfurtscheller, G. & Berghold, A. Patterns of cortical activation during  
1025 planning of voluntary movement. *Electroencephalogr Clin Neurophysiol* **72**,  
1026 250–258 (1989).
- 1027 55. Alegre, M. *et al.* Alpha and beta oscillatory activity during a sequence of two  
1028 movements. *CLINICAL NEUROPHYSIOLOGY* **115**, 124–130 (2004).
- 1029 56. Brinkman, L., Stolk, A., Dijkerman, H. C., de Lange, F. P. & Toni, I. Distinct  
1030 Roles for Alpha- and Beta-Band Oscillations during Mental Simulation of  
1031 Goal-Directed Actions. *Journal of Neuroscience* **34**, 14783–14792 (2014).
- 1032 57. Hammond, G. & Vallence, A.-M. Modulation of long-interval intracortical  
1033 inhibition and the silent period by voluntary contraction. *Brain Res* **1158**, 63–  
1034 70 (2007).
- 1035 58. Opie, G. M., Ridding, M. C. & Semmler, J. G. Task-related changes in  
1036 intracortical inhibition assessed with paired- and triple-pulse transcranial  
1037 magnetic stimulation. *Journal of Neurophysiology* **113**, 1470–1479 (2015).
- 1038 59. Murase, N., Duque, J., Mazzocchio, R. & Cohen, L. G. Influence of  
1039 interhemispheric interactions on motor function in chronic stroke. *Ann.*  
1040 *Neurol.* **55**, 400–409 (2004).
- 1041 60. Oldfield, R. C. The assessment and analysis of handedness: The Edinburgh  
1042 Inventory. *Neuropsychologia* **9**, 97–113 (1971).
- 1043 61. Carson, R. G. *et al.* Characterizing changes in the excitability of corticospinal  
1044 projections to proximal muscles of the upper limb. *Brain Stimul* **6**, 760–768  
1045 (2013).
- 1046 62. Ruddy, K. L. *et al.* Improving the quality of combined EEG-TMS neural  
1047 recordings: Introducing the coil spacer. *Journal of Neuroscience Methods*  
1048 **294**, 34–39 (2018).
- 1049 63. Gueorguieva, R. & Krystal, J. H. Move over ANOVA: progress in analyzing  
1050 repeated-measures data and its reflection in papers published in the Archives  
1051 of General Psychiatry. *Arch. Gen. Psychiatry* **61**, 310–317 (2004).
- 1052 64. Guyon, I., Weston, J., Barnhill, S. & Vapnik, V. Gene Selection for Cancer  
1053 Classification using Support Vector Machines. *Machine Learning* **46**, 389–  
1054 422 (2002).
- 1055 65. Peurala, S. H., Müller-Dahlhaus, J. F. M., Arai, N. & Ziemann, U.  
1056 Interference of short-interval intracortical inhibition (SICI) and short-interval  
1057 intracortical facilitation (SICF). *CLINICAL NEUROPHYSIOLOGY* **119**,  
1058 2291–2297 (2008).
- 1059 66. McDonnell, M. N., Orekhov, Y. & Ziemann, U. The role of  
1060 GABA<sub>B</sub> receptors in intracortical inhibition in the  
1061 human motor cortex. *Exp Brain Res* **173**, 86–93  
1062

**A**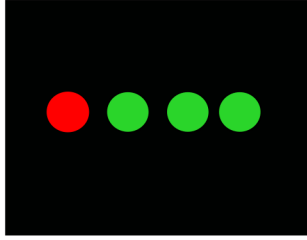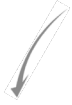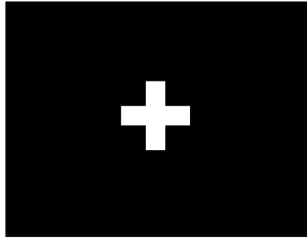**B**

Neurofeedback of  
MEP size

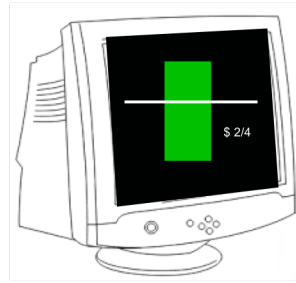

Transcranial Magnetic  
Stimulation (TMS)

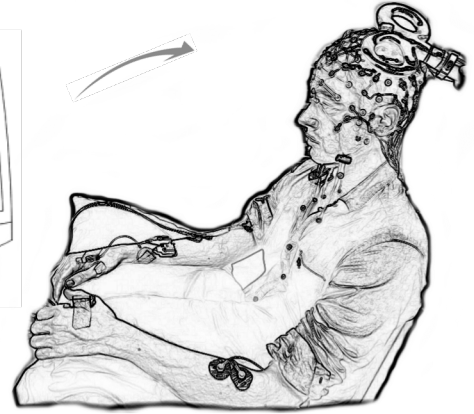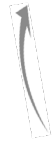

Motor evoked potential  
(MEP)

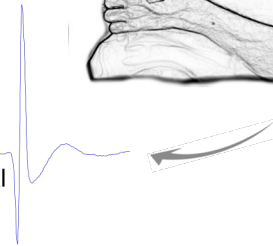**C**

UP Training

DOWN Training

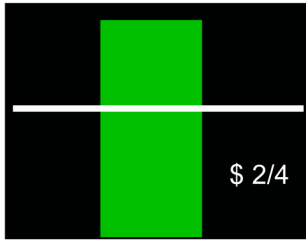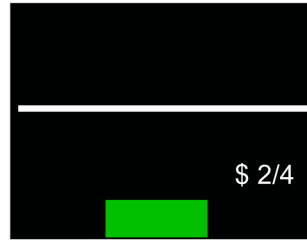

SUCCESS

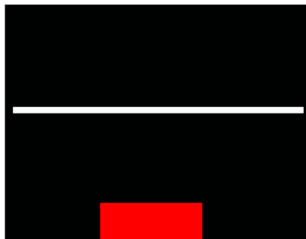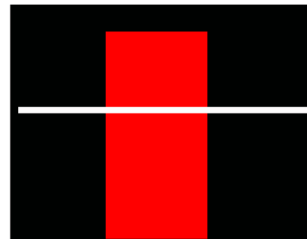

FAILURE

**D**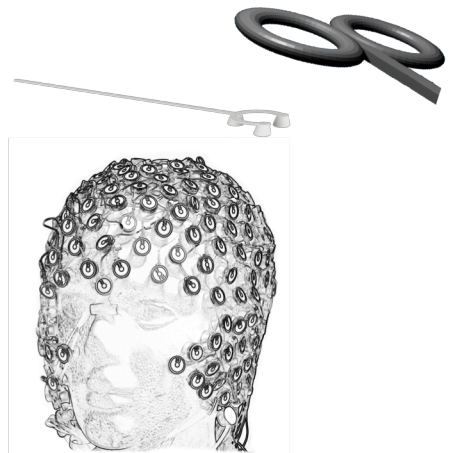

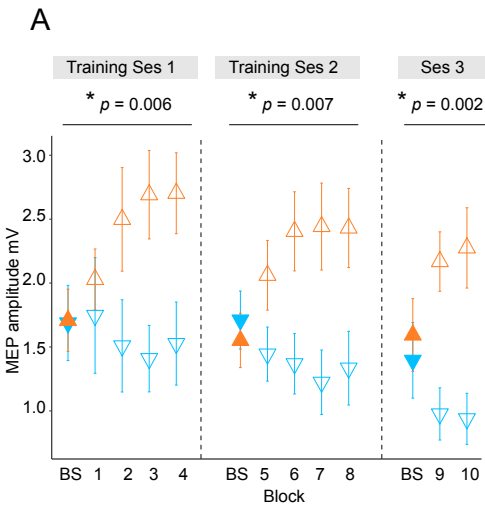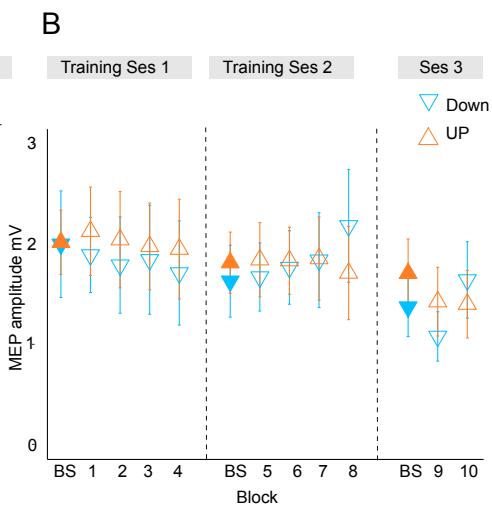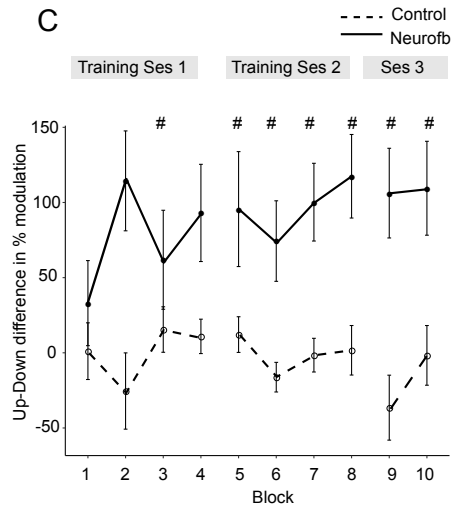

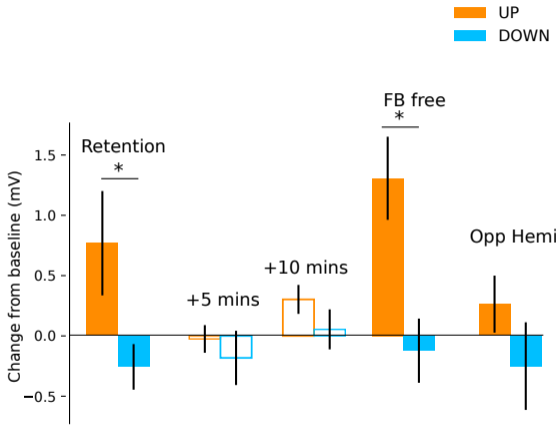



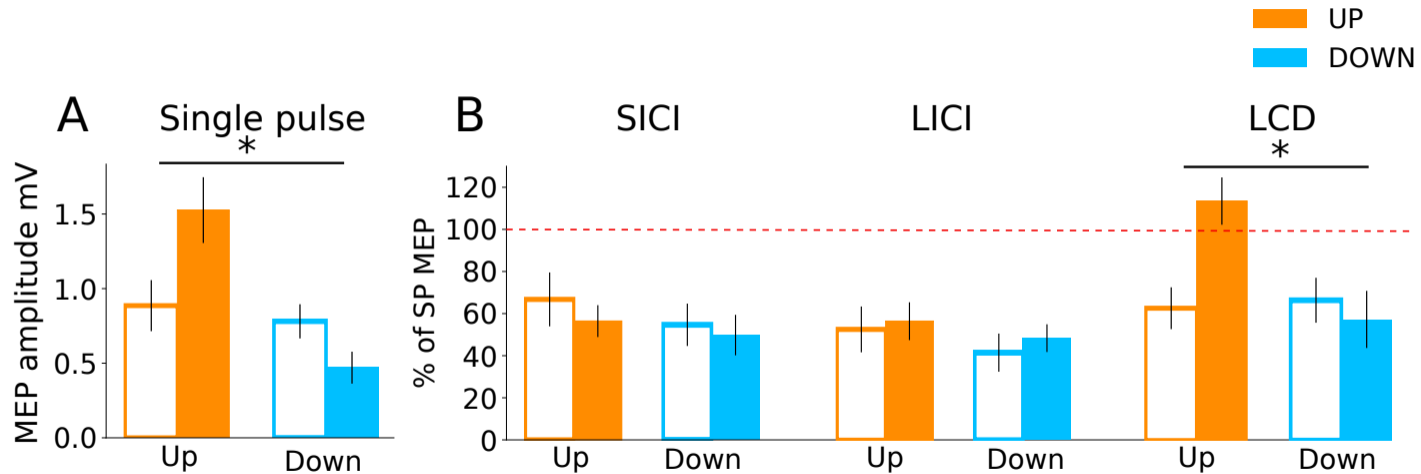

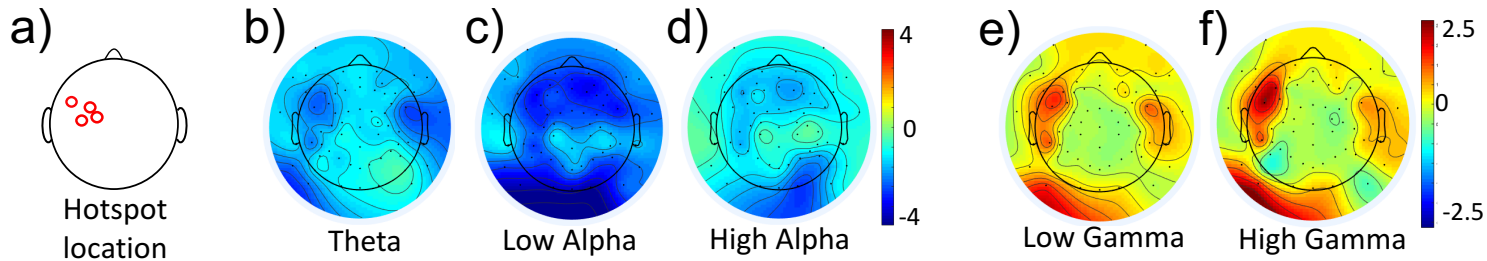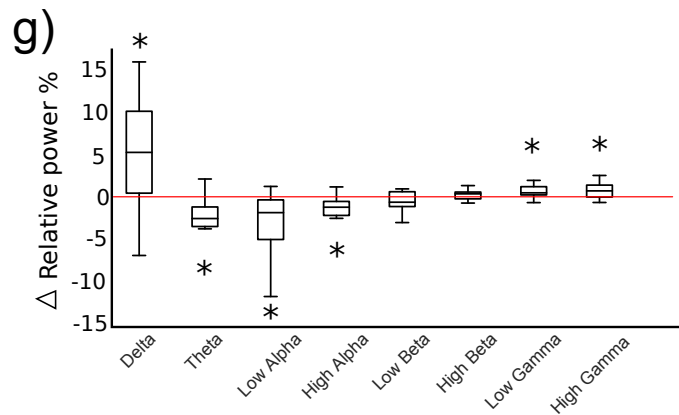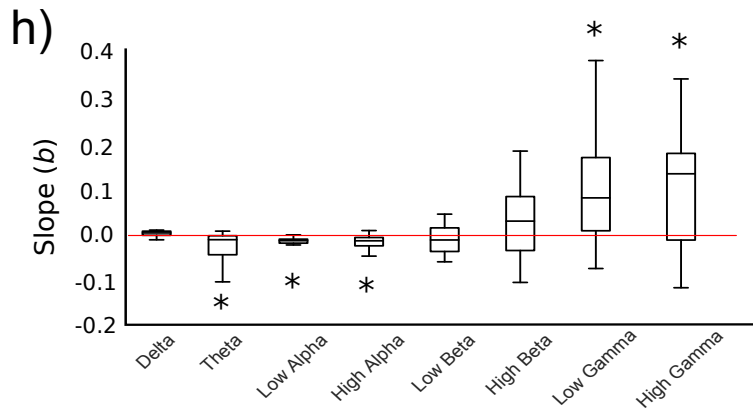

Source: https://www.biorxiv.org/content/10.1101/370130v1.full.pdf
